# Supplementary material
Source: publisher site journal article supplement (https://www.dovepress.com/article/408361)

**Supplementary Figure 1. Quantile normalization of the datasets.**


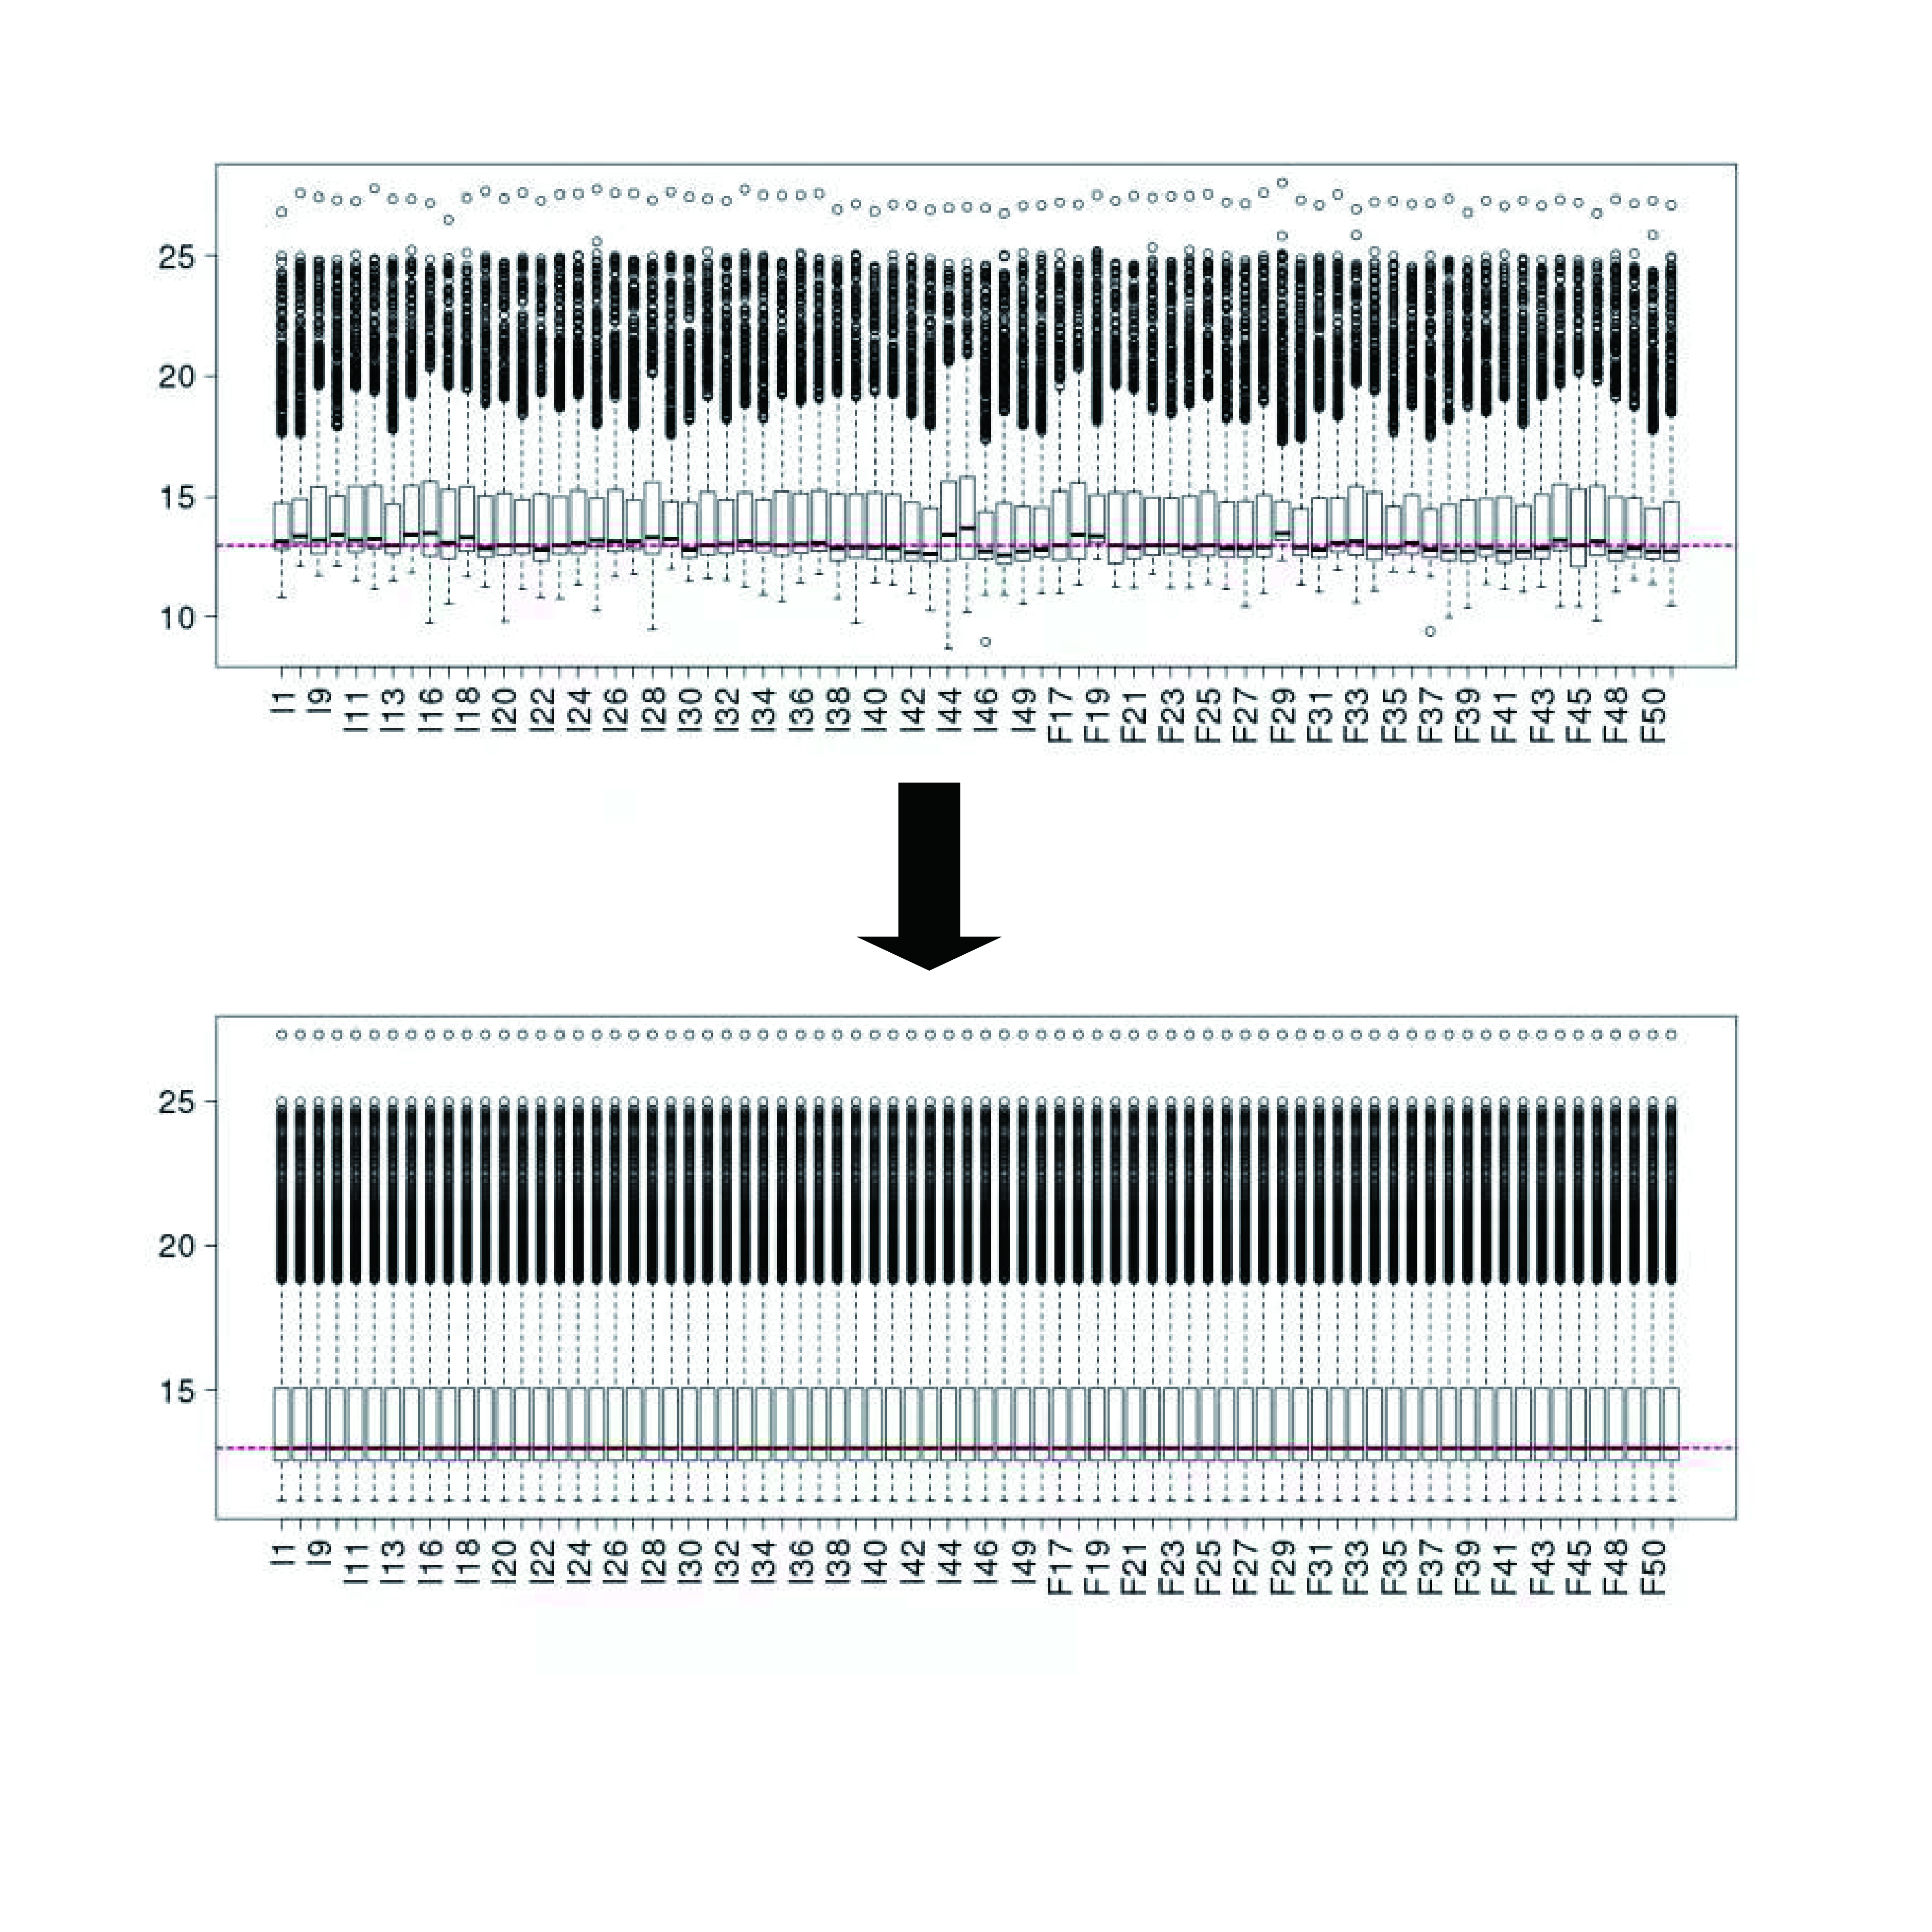


**Supplementary Figure 2**. **GO enrichment analysis of DEPs between the IE and FE groups.** (A) GO enrichment of upregulated DEPs. (B) GO enrichment of downregulated DEPs.


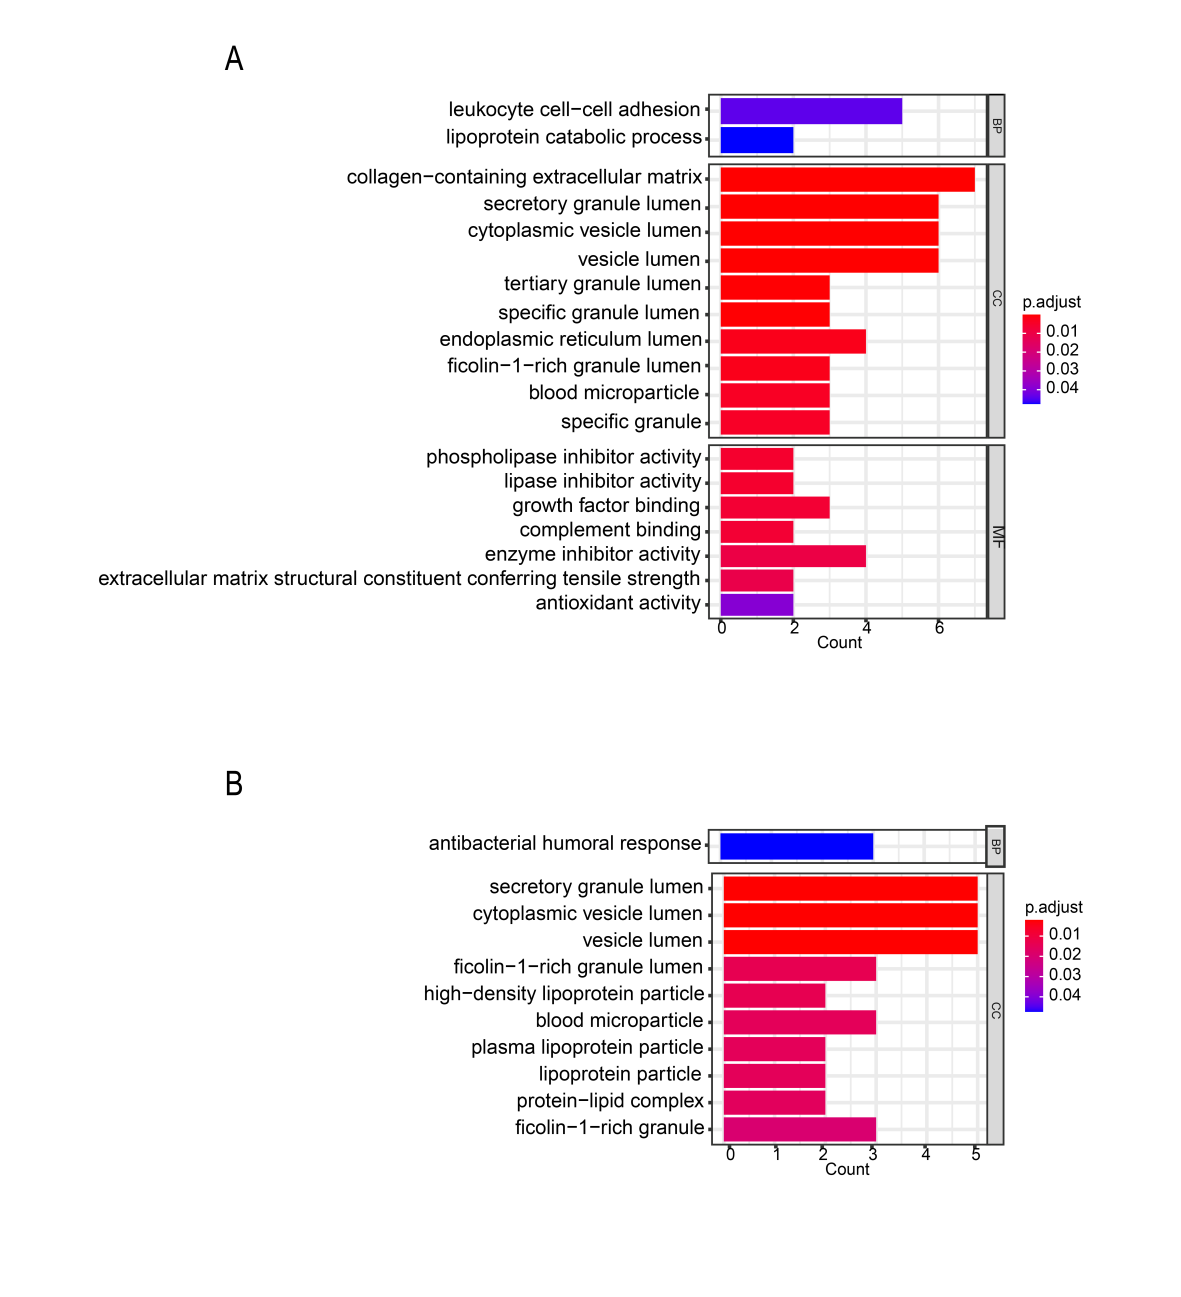

Supplement: Supplementary file 1 [file get_supplementary_file.php]
